# Supplementary material for: Understanding the Contaminant Chemistry of Water Resource at Urban Solid Waste Disposal Site, Hyderabad, India
Source: Research Square preprint supplement (doi:10.21203/rs.3.rs-636661/v1), 2021-06-25
Supplement: Supplementary file 1 [file fba608e405b857c2e81fe187.xlsx]

## Sheet: S W Chem results
Supplemental material 1. Major ion chemistry of Surface water samples.
Location	pH	EC	TH	Ca2+	Mg2+	Na+	K+	CO32-	HCO3-	Cl-	SO42-	NO3-	F-
Pre-monsoon-2011		m S/cm	mg/l
Irlagutta Tank	7.7	17640	1440	56.112	315.952	2127.5	2150.5	0	5368	1949.75	4.8	2000	1.3
Haridaspalli Tank	7.7	12220	1400	256.512	184.71	1840	860.2	0	2104.5	1999.38	1440	500	2.1
Dammaiguda Tank	7.6	2970	420	56.112	68.0512	437	195.5	0	469.7	815.35	16.8	50	1.1
Cherial Tank	7.6	7094	660	120.24	87.4944	943	860.2	0	1403	1772.5	19.2	150	1.6
Kundanpalli vagu (Stream)	7.6	4620	600	160.32	48.608	678.5	351.9	0	988.2	1134.4	9.6	100	1.4
Post-monsoon-2011
Irlagutta Tank	7.97	24170	N A	N A	N A	N A	N A	N A	N A	N A	N A	N A	N A
Dammaiguda Tank	7.5	4510	580	88.176	87.4944	575	312.8	0	225.7	1276.2	184.8	55.8	1.3
Cherial Tank	7.67	5958	720	88.176	121.52	690	664.7	0	1055.3	1446.36	100.8	68.2	1.2
Pre-monsoon-2012
Irlagutta Tank	8.34	90560	N A	N A	N A	N A	N A	N A	N A	N A	N A	N A	N A
Dammaiguda Tank	8.79	4390	560	76	90	681	119	72	207	993	392	110	0.19
Cherial Tank	7.88	11390	800	100.2	133.672	1495	1212.1	0	298.9	2906.9	1008	229.4	1.41
JNNURM Madyalavagu (Stream)	7.79	1762	575	128.256	61.9752	131.1	1.564	0	152.5	460.85	63.36	9.92	0.7
Post-monsoon-2012
Irlagutta Tank	9.06	3230	460	56.112	77.7728	440.45	152.842	120	85.4	694.82	278.994	85	0.74
Cherial Tank	8.02	4260	1220	144.288	209.014	415.15	3.80052	0	317.2	1191.12	151.544	36	0.13
JNNURM Madyalavagu (Stream)	8.5	1220	350	56.112	51.0384	117.3	1.03693	9	42.7	304.87	116.673	7	0.75
NA: Not analysed.														.
